# Supplementary material for: Chemoenzymatic modification of silk fibroin with poly(2,6-dimethyl-1,5-phenylene ether) using horseradish peroxidase
Source: Royal Society of Chemistry journal article supplement (doi:10.1039/c6ra02258h), 2016-01-01
Supplement: c6ra02258h1.pdf [file c6ra02258h1.pdf]

Electronic Supplementary Information for

# **Chemoenzymatic modification of silk fibroin with poly(2,6-dimethyl-1,5-phenylene ether) using horseradish peroxidase**

Leo Simmons, Kousuke Tsuchiya,\* and Keiji Numata\*

Enzyme Research Team, Biomass Engineering Research Division, RIKEN Center for Sustainable Resource Science, 2-1 Hirosawa, Wako, Saitama 351-0198, Japan.

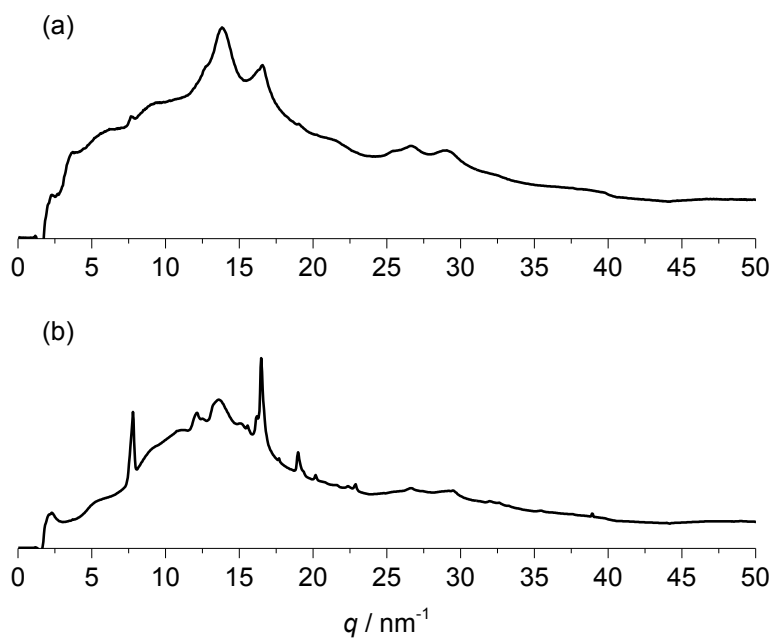

**Fig. S1.** WAXD profiles of PPE modified silk with the DMP feed concentration of (a) 0.02 M and (b) 0.08 M.
